# Supplementary material for: Weight Gain Predicts Metabolic Syndrome among North Korean Refugees in South Korea
Source: MDPI journal article supplement (doi:10.3390/ijerph18168479), 2021-08-11
Supplement: s1 [file s1]

**Supplementary Table S1.** Health questionnaire of NORNS study

| Questionnaire                    | Description                                                                                                                                                                                                                         |
|----------------------------------|-------------------------------------------------------------------------------------------------------------------------------------------------------------------------------------------------------------------------------------|
| Sociodemographic characteristics | Sex, age, education level in North Korea, main job in North and South Korea, marital status in North and South Korea, current income, resident area in North Korea, date of escape from North Korea, date of arrival in South Korea |
| Disease history                  | Disease diagnosed by medical doctor in South or North Korea                                                                                                                                                                         |
| Health-related lifestyle         | Smoking, alcohol drinking, exercise, nutritional supplements intake                                                                                                                                                                 |
| Women health                     | Menstration status, pregnancy and delivery history                                                                                                                                                                                  |
| Mental health                    | Depression, psychological stress, suicidal trial, suicidal idea                                                                                                                                                                     |
